# Supplementary material
Source: publisher figshare collection journal article supplement (https://acs.figshare.com/ndownloader/files/9071134)
Supplement: Supplementary file 1 [file 9071134]

# Thermodynamic Routes to Novel Metastable Nitrogen-Rich Nitrides

Wenhao Sun<sup>1,2</sup>, Aaron Holder<sup>3</sup>, Bernardo Orvañanos<sup>1</sup>, Elisabetta Arca<sup>3</sup>, Andriy Zakutayev<sup>3</sup>, Stephan Lany<sup>3</sup>, Gerbrand Ceder<sup>1,2,4</sup>

<sup>1</sup>Department of Materials Science and Engineering, Massachusetts Institute of Technology, Cambridge, MA 02139 USA.

<sup>2</sup>Materials Sciences Division, Lawrence Berkeley National Laboratory, Berkeley, California 94720, USA

<sup>3</sup>National Renewable Energy Laboratory, Golden, Colorado 80401, USA

<sup>4</sup>Department of Materials Science and Engineering, UC Berkeley, Berkeley, California 94720, USA

\*Correspondence to: [gceder@berkeley.edu](mailto:gceder@berkeley.edu)

## **Supplementary Information**

- **SI.1: Formation Energy Correction Scheme Benchmarking**
  - SI.1.1: Nitride formation energies in two formation energy correction schemes
  - SI.1.2: Nitride formation energies in SCAN / gas-fit correction
- 
- **SI.2: New SCAN Predicted Stable Nitride Polymorphs**
- **SI.3: Select Nitride Convex Hulls**
  - Nitride convex hulls in the MP/FERE/SCAN schemes
  - Bi, Cr, Cu, Fe, Hf, Ir, Mn, Mo, Nb, Pb, Pd, Pt, Re, Ru, Sb, Sn, Ta, Ti, V, W, Zr

### SI.1.1: Nitride formation energies in two formation energy correction schemes

We investigate the performance of two such correction schemes for use in the nitrides: the fitted-elemental reference scheme (FERE),<sup>4</sup> and the gas-fit reference scheme,<sup>5</sup> as currently employed in the Materials Project (henceforth referred to as the ‘MP’ scheme). In the FERE scheme, all elemental energies are determined simultaneously by a linear least-squares fit on *all* elemental-phase chemical potentials, to minimize formation energy errors. In the FERE scheme, all intermediate compounds are calculated from a GGA +  $U$  framework, with a +  $U$  value of 3 eV for all compounds. In the MP scheme for nitrides, only the error arising from GGA over-binding in the N<sub>2</sub> molecule is treated; by preserving the total energies of all the metal elemental references, and performing a linear least-squares fit on *only* the N<sub>2</sub> gas chemical potential to minimize formation energy errors. On the Materials Project, more sophisticated schemes are also employed in the transition metal oxides to attain a +  $U$  value for transition metals,<sup>5</sup> and for mixing GGA and GGA +  $U$  formation energies in ternary spaces,<sup>6</sup> but such an analysis has not been systematically carried out for the nitrides.

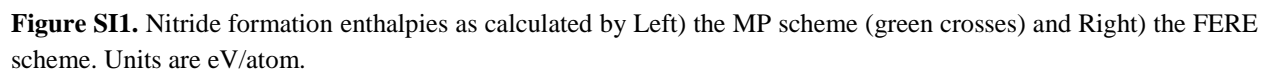

When benchmarked against the formation energies of binary nitrides with tabulated thermochemical data, the formation energies of both correction schemes perform similarly well. Figure

SI.1 shows the root-mean-squared-error (RMSE) of the MaterialsProject Scheme, and the FERE scheme, for a collection of binary nitrides. The overall RMSE for the MP scheme is 103 meV/atom (with a major outlier for the semiconductor  $\text{Ta}_3\text{N}_5$ ), and is 117 meV/atom for the FERE scheme (with an outlier for the intermetallics  $\text{VN}$ ,  $\text{Mo}_2\text{N}$ , and  $\text{Fe}_x\text{N}$ ). It is somewhat counterintuitive that the FERE scheme, which is fit on all elements, has a slightly greater error than the MP scheme, which only fits the  $\text{N}_2$  chemical potential. However, this may be because there are fewer nitrides than oxides, which means a FERE-scheme fitting of all compounds biases an accurate description for oxides over the nitrides, whereas the MP-scheme corrections are focused in the specific nitride space. However, the difference in formation energy errors between the two schemes is only 15 meV/atom, which is too small to distinguish between the thermochemical predictability of the two schemes.

Tabulated calorimetry data for the nitrides is most prevalent for nitrides with large negative formation energies. However, in chemical spaces with thermoneutral or small negative formation energies, there are significant and qualitative differences in the convex hulls as calculated from FERE and MP. Figure SI.2 highlights in the Fe-N system particularly prominent differences in the calculated convex hulls by the MP and FERE scheme. In the FERE scheme, all  $\text{Fe}_x\text{N}_y$  compounds have positive formation energy with respect to standard state conditions, whereas in the MP scheme, the Fe-N subnitrides have negative formation energy. The MP scheme prediction of negative formation energies in the iron subnitrides is consistent with experimental calorimetry measurements.<sup>7</sup> The positive formation energies in the FERE scheme for the subnitrides is likely due to the use of a DFT  $+U$  value of +3 eV for all binary nitride compounds. Typically  $+U$  is employed to increase the calculated band gap, which is underpredicted in DFT, giving a better description of electronic structure for semiconducting and insulating compounds. However, transition metal subnitrides tend to exhibit intermetallic electronic structure, and thus would be poorly described by a DFT  $+U$  scheme. DFT  $+U$  results in more positive formation energies, explaining why the calculated formation energies of the subnitrides in the Fe-N system are unphysically above the convex hull.

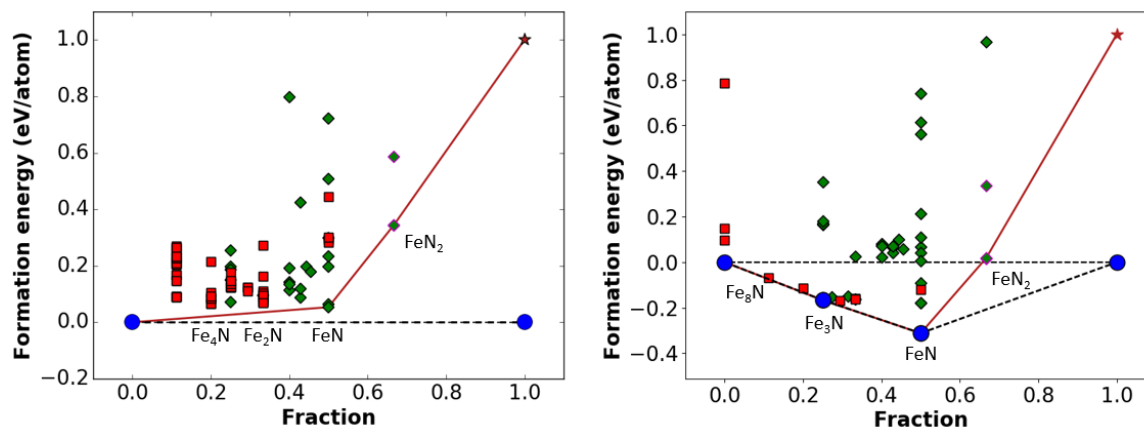

**Figure SI.2.** Nitride formation enthalpies as calculated by Left) the FERE scheme (green crosses) and Right) the MP scheme. Units are eV/atom.

On the other hand, because the MP scheme uses only pure GGA-PBE calculations, the band gap of the *nitrogen-rich* nitrides, which are likely to be semiconductors and insulators, are probably underpredicted, resulting in overstabilized formation energies in the nitrogen-rich portion of the convex

hull. Figure SI3. shows the formation energy error as a function of oxidation state in the MP vs FERE schemes. For binary nitrides with oxidized metal cations, there is a consistent overbinding in a pure GGA scheme, which scales with the cation oxidation state.

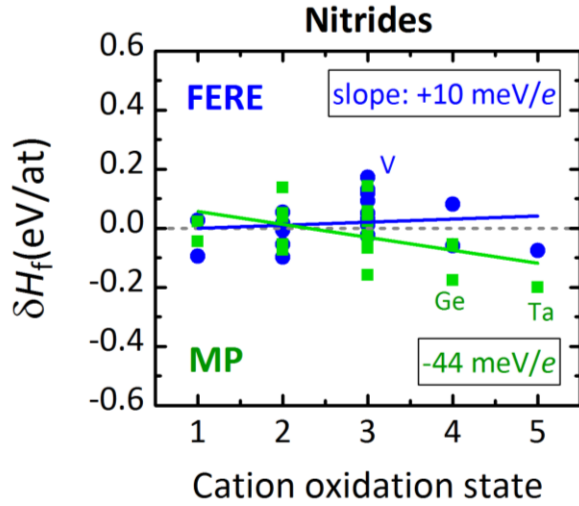

**Figure SI3.** Formation energy error in the FERE and MP schemes for nitrides with oxidized metal cations

The primary focus of this work is the determination of the critical  $\Delta\mu_{N_2}$  required to stabilize novel metastable nitrogen-rich binary nitrides. Accurate prediction of this value relies on correct formation energies for both the nitrogen-rich phase, and for the next-reduced nitride in composition space. Because of the errors inherent in both the MP and the FERE scheme, the predicted critical  $\Delta\mu_{N_2}$  can vary significantly and qualitatively between these two schemes. To illustrate this difference, Table SI.1. shows the energy above the hull and the critical  $\Delta\mu_{N_2}$  for three nitrogen-rich transition metal nitrides. In the MP scheme the overstabilization of the nitrogen-rich phase leads to small or zero energy above the hull results, resulting in zero or moderate critical  $\Delta\mu_{N_2}$  required to stabilize these phases. However, because these nitrogen-rich transition metal nitrides have never been experimentally observed in these well-explored chemical spaces, these stability predictions from the MP scheme are probably inaccurate. On the other hand, FERE understabilizes the next-reduced nitride, which in these three systems is likely an intermetallic mononitride. Coupled with a high, but probably accurate, formation energy of the nitrogen-rich phase, this can result in high, positive critical  $\Delta\mu_{N_2}$ . As shown in Table SI.1., the difference in the critical  $\Delta\mu_{N_2}$  as calculated in the two schemes can differ by more than 2 eV/N, which is a qualitative difference in prediction between ‘synthesizable’ and ‘not synthesizable’.

**Table SI.1.** Energy above the hull and critical  $\Delta\mu_{N_2}$  for several nitrogen-rich transition metal nitrides

| Predicted Nitride | Decomposition Products | MP $\Delta H$ above hull (eV/atom) | FERE $\Delta H$ above hull (eV/atom) | MP Critical $\Delta\mu_{N_2}$ (eV/N) | FERE Critical $\Delta\mu_{N_2}$ (eV/N) |
|-------------------|------------------------|------------------------------------|--------------------------------------|--------------------------------------|----------------------------------------|
| $Cr_3N_4$         | $CrN+N_2$              | Stable                             | 0.340                                | 0                                    | 2.38                                   |
| $Mn_3N_4$         | $MnN+N_2$              | 0.059                              | 0.294                                | 0.41                                 | 2.06                                   |
| $V_3N_4$          | $VN+N_2$               | Stable                             | 0.144                                | 0                                    | 1.01                                   |

Despite the ability of the two schemes to accurately predict the formation energies of strongly exothermic binary nitrides, the deficiencies of both schemes at determining electronic structure consistently across the metal-nitrogen composition space yields widely varying predictions of critical

$\Delta\mu\text{N}_2$ . By the use of  $+U$  value in the FERE scheme, it is estimated that the critical  $\Delta\mu\text{N}_2$  will generally be overpredicted, whereas the MP scheme will underpredict the critical  $\Delta\mu\text{N}_2$ . For the sake of experimental investigation, it was necessary to identify a more reliable critical  $\Delta\mu\text{N}_2$  prediction scheme, that would provide a more accurate prediction of the formation energies over all metal-nitride compositions, from the intermetallic sub-nitrides to the semiconducting/insulating nitrogen-rich phases.

### SI.1.2: Nitride formation energies in SCAN / gas-fit correction

The SCAN metaGGA functional was released in Fall 2016,<sup>8</sup> which by its construction, theoretically offers a superior description of electronic structure across compounds with diverse bonding.<sup>9</sup> We benchmarked the SCAN functional for prediction of nitride formation energies and critical  $\Delta\mu\text{N}_2$ . We benchmark the prediction capability of the SCAN functional against known experimental formation energies of binary nitrides, finding a root-mean-squared-error (RMSE) of 0.128 eV/atom when the  $\text{N}_2$  reference state is calculated in DFT from a molecule-in-a-box. By fitting the energy of the SCAN  $\text{N}_2$  gas phase to minimize formation energy errors, this RMSE was reduced to 0.099 eV/atom. This is a marginally lower error than in the pure GGA gas-fit scheme as implemented in the Materials Project, which has RMSE = 0.103 eV/atom, and from the FERE scheme, which has RMSE = 0.117 eV/atom. When the critical  $\Delta\mu\text{N}_2$  is calculated with the gas-fit scheme in the SCAN functional, in general we obtain intermediate  $\Delta\mu\text{N}_2$  as compared to the MP and FERE correction schemes, although specific systems may vary based on how MP and FERE schemes treat the electronic structure. Table SI.2 offers a comparison of the critical  $\Delta\mu\text{N}_2$  as obtained from the three schemes. By manual investigation of the convex hulls, it appears that SCAN accurately reproduces negative formation energies in the subnitride region, while not overstabilizing the nitrogen-rich phases as from a PBE-GGA scheme. We therefore ultimately base our analysis in this work on a formation energy calculation scheme based on SCAN, with a gas-fit nitrogen chemical potential.

**Table SI. 2.** Critical  $\Delta\mu\text{N}_2$  as calculated in the gas-fit ‘MP’ and FERE schemes, and the gas-fit scheme using a SCAN functional. A triple dash signifies critical  $\Delta\mu\text{N}_2$  greater than +1.5 eV/N.

| Predicted Nitride                       | MP Critical $\Delta\mu\text{N}_2$ (eV/N) | FERE Critical $\Delta\mu\text{N}_2$ (eV/N) | SCAN Critical $\Delta\mu\text{N}_2$ (eV/N) |
|-----------------------------------------|------------------------------------------|--------------------------------------------|--------------------------------------------|
| BiN                                     | 0.655                                    | ---                                        | 1.437                                      |
| CoN                                     | ---                                      | 0.704                                      | 0.227                                      |
| $\text{Cr}_3\text{N}_4$                 | STABLE                                   | ---                                        | 0.917                                      |
| $\text{Cr}_3\text{N}_5$                 | 0.559                                    | ---                                        | ---                                        |
| $\text{CrN}_2$                          | 0.074                                    | ---                                        | 0.817                                      |
| <b><math>\text{Cu}_3\text{N}</math></b> | ---                                      | <b>0.698</b>                               | <b>1.048</b>                               |
| $\text{FeN}_2$                          | 0.536                                    | 0.619                                      | 0.537                                      |
| $\text{IrN}_2$                          | 0.240                                    | 0.701                                      | 0.568                                      |
| $\text{Mn}_3\text{N}_4$                 | 0.397                                    | ---                                        | 0.602                                      |
| $\text{Mo}_2\text{N}_3$                 | 0.699                                    | 0.972                                      | 1.199                                      |
| $\text{Mo}_3\text{N}_5$                 | 0.586                                    | 0.978                                      | 0.883                                      |
| $\text{MoN}_2$                          | 0.741                                    | ---                                        | 1.152                                      |
| $\text{Nb}_3\text{N}_5$                 | 0.830                                    | ---                                        | 0.925                                      |
| $\text{Pb}_3\text{N}_4$                 | 0.811                                    | ---                                        | 1.304                                      |
| $\text{Re}_3\text{N}_4$                 | 0.194                                    | ---                                        | 0.641                                      |
| $\text{Re}_3\text{N}_5$                 | 0.069                                    | ---                                        | 0.681                                      |
| ReN                                     | 0.013                                    | ---                                        | 0.477                                      |
| $\text{ReN}_2$                          | 0.137                                    | ---                                        | 0.587                                      |
| SbN                                     | 0.362                                    | ---                                        | 0.799                                      |

|                                |        |       |       |
|--------------------------------|--------|-------|-------|
| Ti <sub>3</sub> N <sub>4</sub> | 0.705  | 0.669 | 0.602 |
| V <sub>3</sub> N <sub>4</sub>  | STABLE | ---   | 0.756 |

## SI.2. New SCAN Predicted Stable Nitride Polymorphs

For the FeN, TiN, Mn<sub>3</sub>N<sub>2</sub>, VN, CrN, and NbN compounds, our DFT-SCAN calculations on DMSP-suggested nitrides determine several new polymorphs that are lower in total energy than the lowest-energy known nitride phase. The observation of these lower-energy polymorphs may suggest that the ground-state crystal structures in these compounds have not yet been synthesized yet. However, DFT does have some notable failures in predicting accurate relative polymorph energetics,<sup>10,11</sup> although SCAN seems to have better polymorph energy rankings in some transition metal oxides,<sup>12</sup> potentially due to satisfaction of all known constraints appropriate to a semilocal exchange-correlation functional, and its accurate representation of all types of orbital overlap. We list below the lower-energy phases in these compounds, and urge readers to interpret their predicted stability within the context of potential DFT errors. We note that this list is significantly longer when total energies are calculated using a standard GGA-PBE functional.

While most predicted stable polymorphs are within -10 meV/atom of the known ground-state nitride, CrN and VN have significantly more stable predicted phases. Both CrN and VN are known to exhibit low-temperature dynamical instabilities,<sup>13,14</sup> which likely underlies the DFT-predicted metastability of the rocksalt phase, which is the stable phase at room temperature. More sophisticated sampling of temperature-dependent magnetic structure may also be required to calculate accurate relative free-energy differences between polymorphs.<sup>14,15</sup>

| Composition                    | E. below known<br>(meV/atom) | Original<br>ICSD Number | Original ICSD<br>Composition     | Space Group<br>Symbol |
|--------------------------------|------------------------------|-------------------------|----------------------------------|-----------------------|
| FeN                            | 0                            | 41258                   | FeN                              | F-43m                 |
|                                | -2.38                        | 181079                  | CrN                              | F-43m                 |
|                                | -3.06                        | 167513                  | OsN                              | Pmn2/1                |
|                                | -10.3                        | 162871                  | BN                               | R3m                   |
| TiN                            | 0                            | 64904                   | TiN                              | Fm-3m                 |
|                                | -2.28                        | 162872                  | BN                               | P-6m2                 |
|                                | -3.3                         | 162875                  | BN                               | P42/mnm               |
| Mn <sub>3</sub> N <sub>2</sub> | 0                            | 152810                  | Mn <sub>3</sub> N <sub>2</sub>   | I4/mmm                |
|                                | -1.06                        | 91273                   | Sr <sub>2</sub> NiN <sub>2</sub> | Pnma                  |
| VN                             | 0                            | 62468                   | VN                               | Fm-3m                 |
|                                | -7                           | 162872                  | BN                               | P-6m2                 |
|                                | -36.3                        | 162876                  | BN                               | Pnma                  |
|                                | -36.4                        | 163951                  | AlN                              | Cmcm                  |
|                                | -76.6                        | 99452                   | MoN                              | P63mc                 |
|                                | -81.7                        | 76280                   | MoN                              | P1                    |
|                                | -109                         | 150967                  | NbN                              | P63/mmc               |
|                                | -109                         | 76280                   | MoN                              | P1                    |
|                                | -111                         | 99452                   | MoN                              | P63mc                 |
|                                | -216                         | 181299                  | ReN                              | P-6m2                 |
| CrN                            | 0                            | 41827                   | CrN                              | Fm-3m                 |
|                                | -30.1                        | 161754                  | CoN                              | F-43m                 |
| NbN                            | 0                            | 644536                  | NbN                              | P-6m2                 |

|  |      |        |     |       |
|--|------|--------|-----|-------|
|  | -0.1 | 169820 | VN  | P-6m2 |
|  | -0.2 | 168368 | MoN | Pm    |

### SI.3: Select Nitride Convex Hulls

Calculated nitride convex hulls are shown for the Au, Ba, Bi, Ca, Cr, Cu, Fe, Hf, Ir, Mn, Mo, Na, Nb, Os, Pb, Pd, Pt, Re, Ru, Sb, Sn, Sr, Ta, Ti, V, W, and Zr systems, as calculated in the MP and FERE formation energy correction schemes. The SCAN formation energy correction scheme uses the same gas-fit elemental reference correction as the MP scheme, but total energies are calculated within the newly developed SCAN functional. FERE does not have fitted elemental reference energies for Pb, Re, and Ru, so their convex hulls are not shown here. The dashed line shows the convex hull under standard state  $N_2$  gas, the red convex hull is with respect to a nitrogen chemical potential of +1 eV/N. Red squares are known ICSD phases, green diamonds are predicted phases. Orange squares are ICSD phases identified after 2012, and materials with magenta borders have N-N bond lengths corresponding to pernitrides.

#### Ba-N

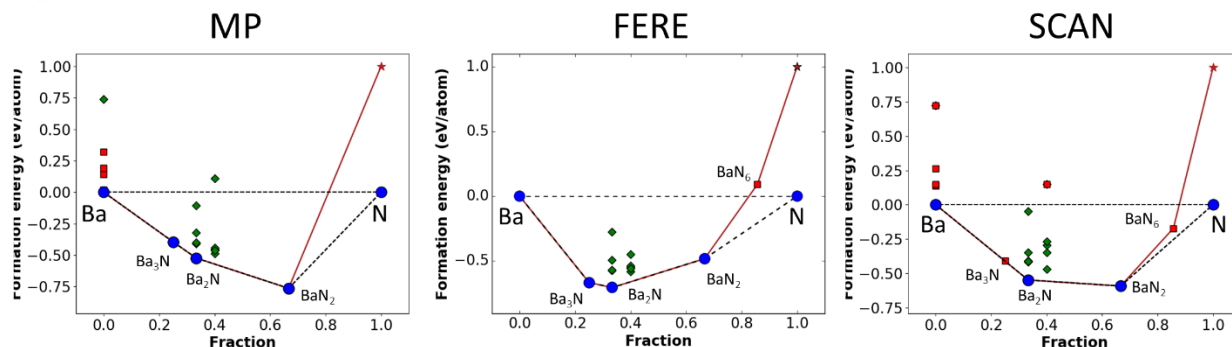

#### Bi-N

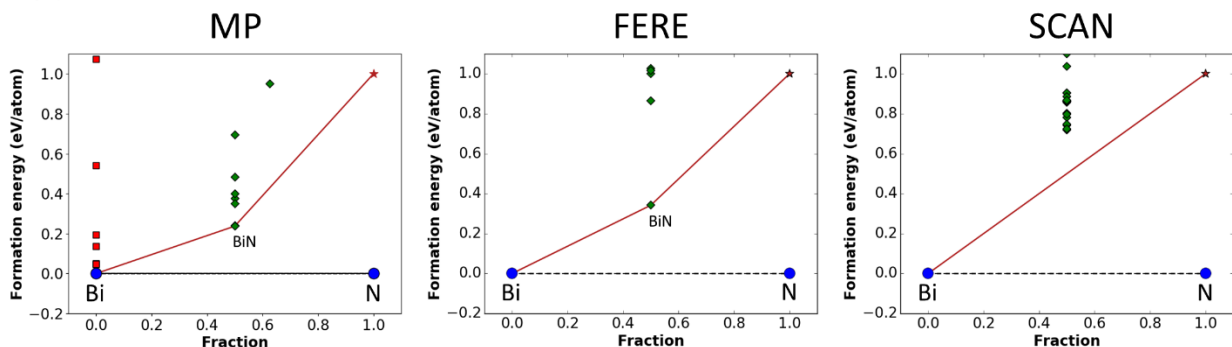

#### Ca-N

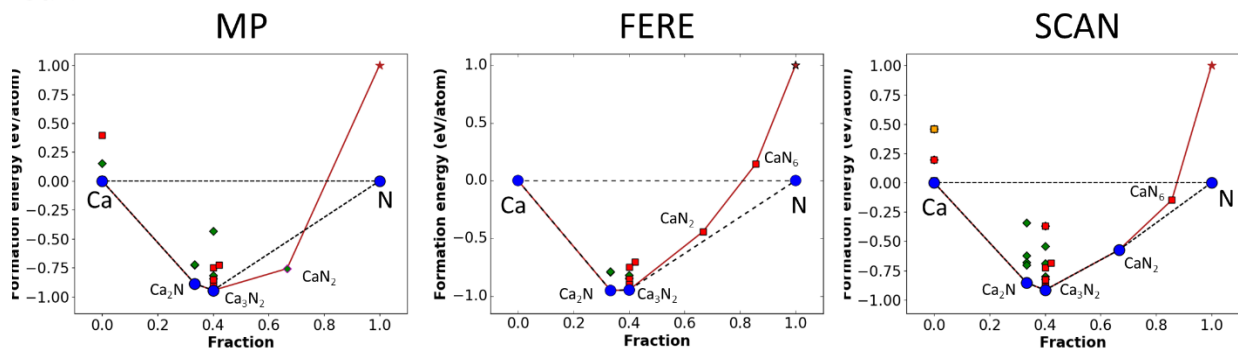

## Cr-N

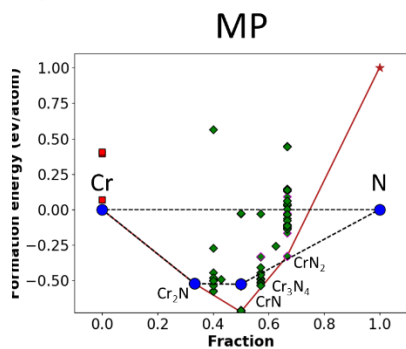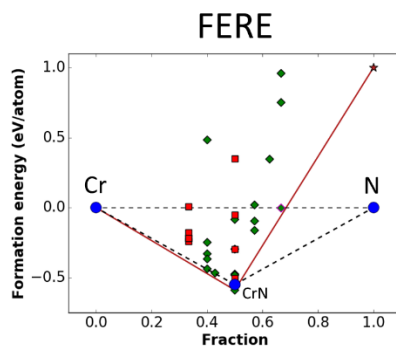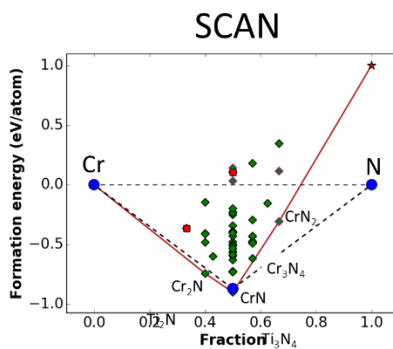

## Cu-N

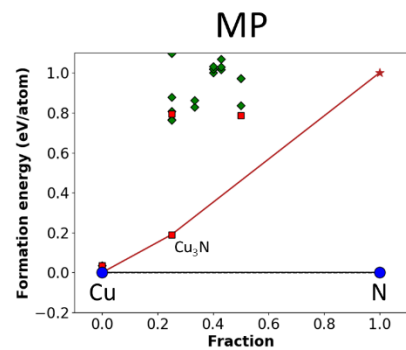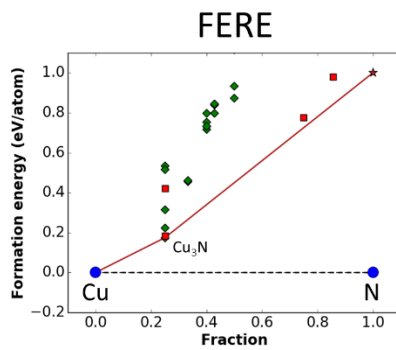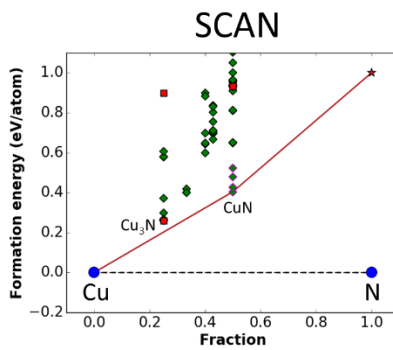

## Fe-N

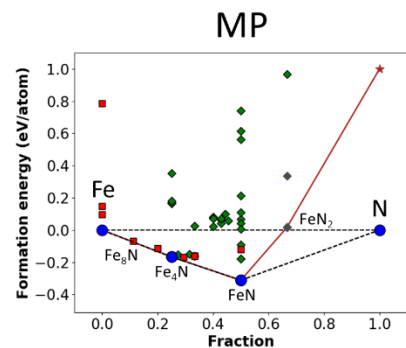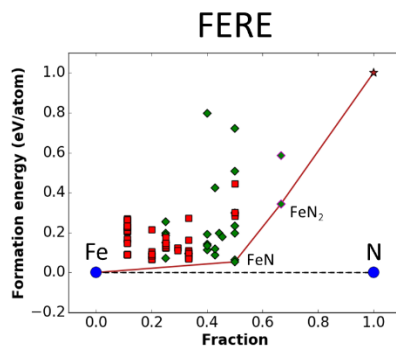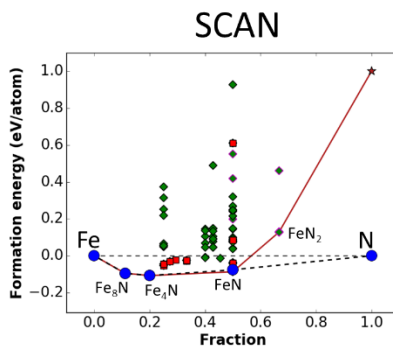

## Hf-N

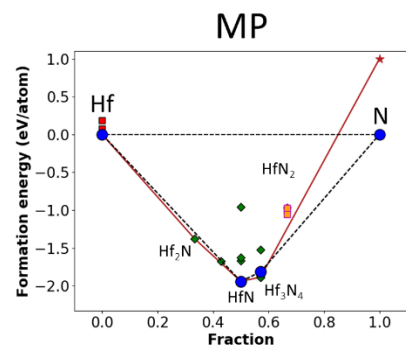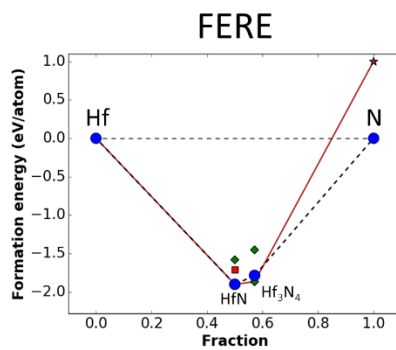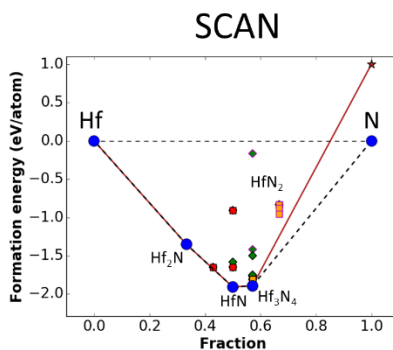



## Ir-N

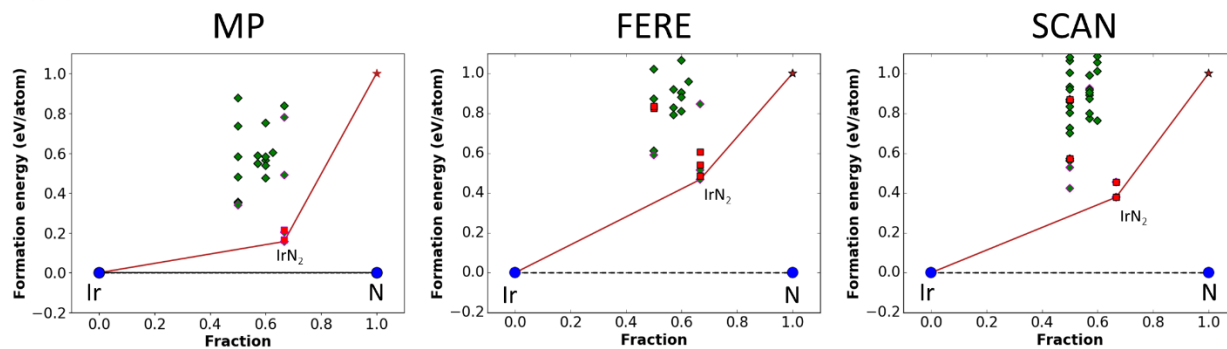

## Mn-N

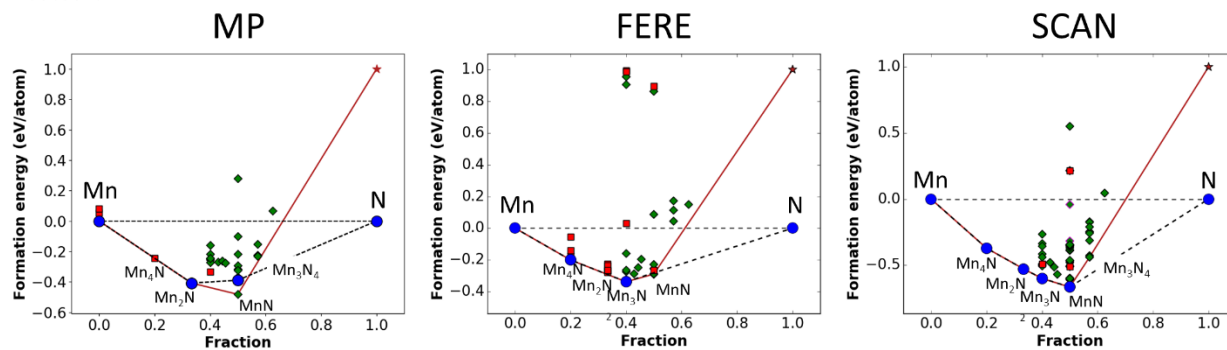

## Mo-N

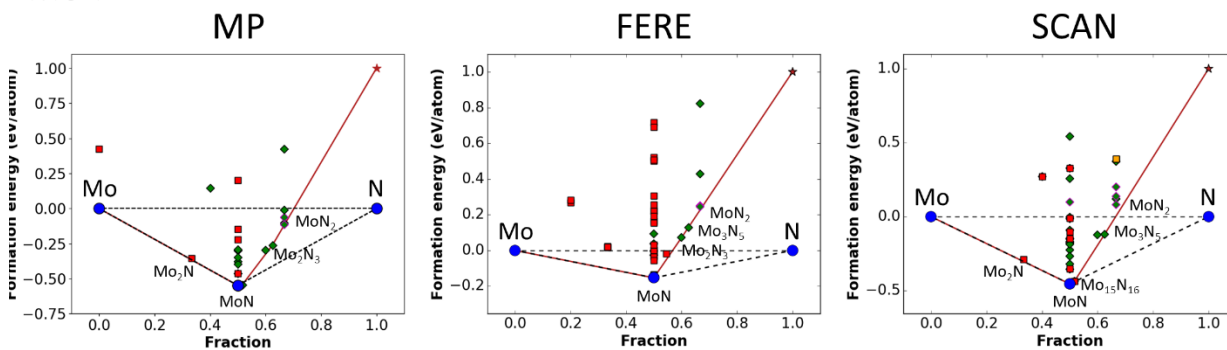

## Na-N

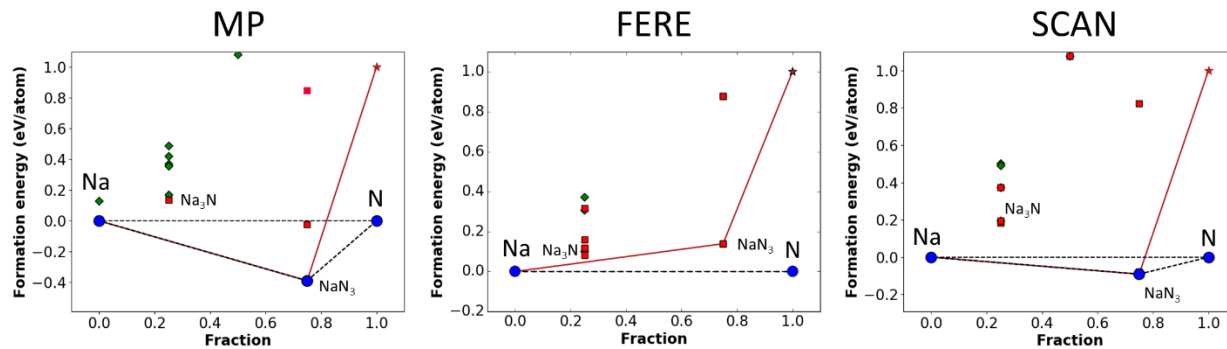

## Nb-N

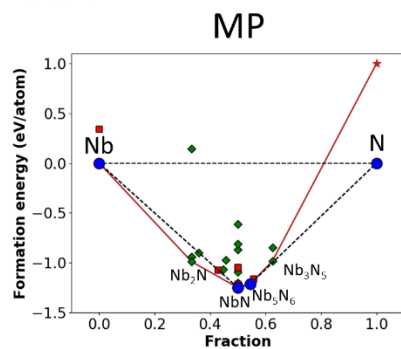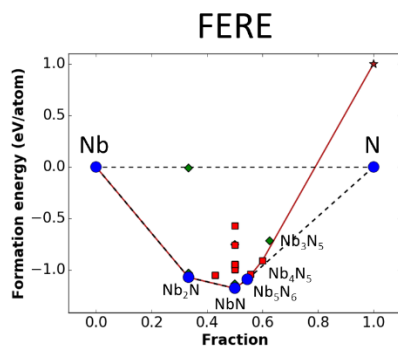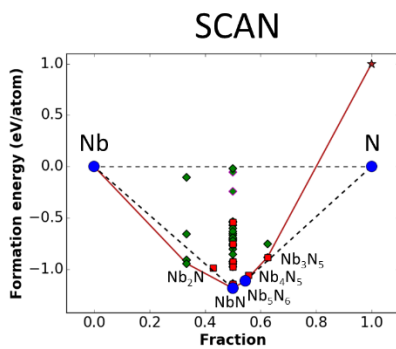

## Pb-N

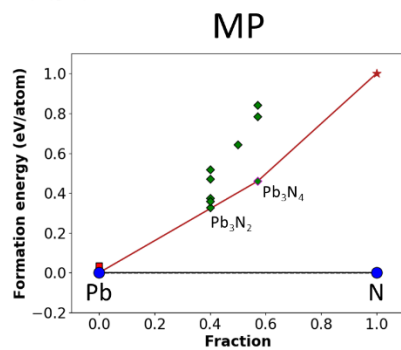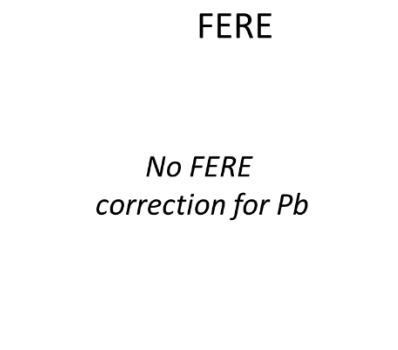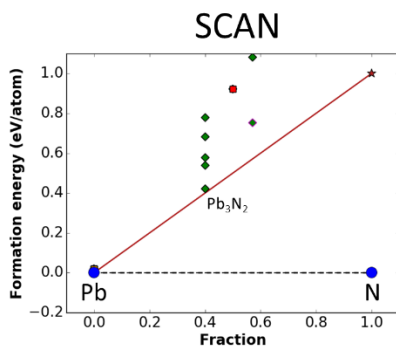

## Pd-N

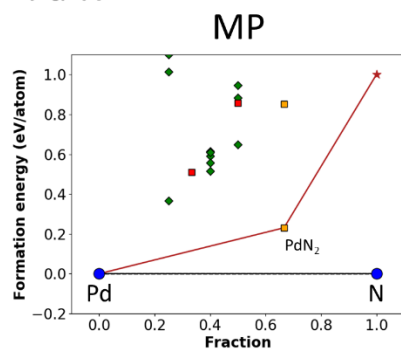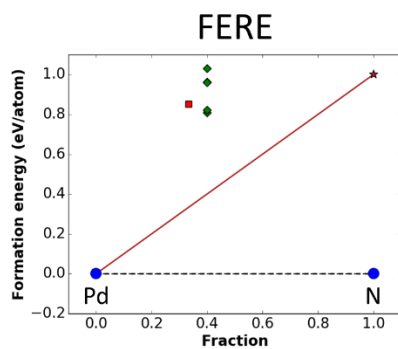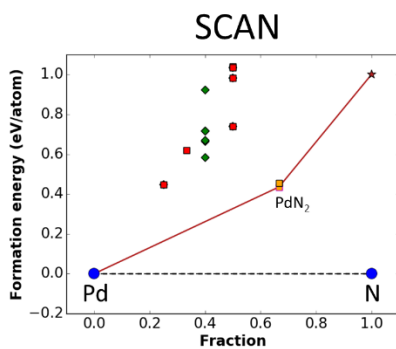

## Pt-N

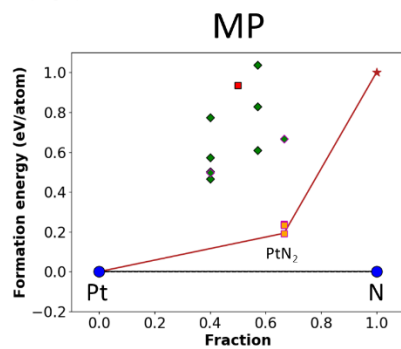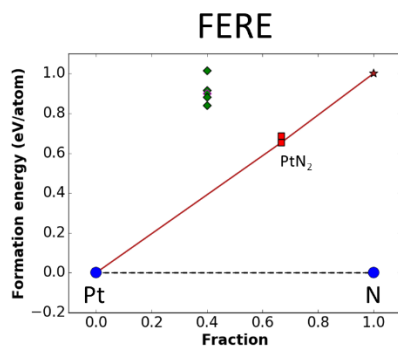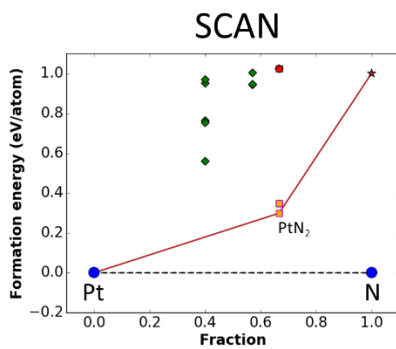

# Re-N

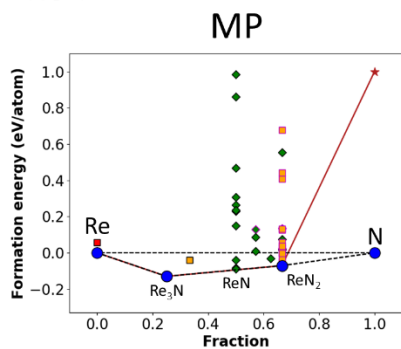

# FERE

No FERE  
correction for Re

# SCAN

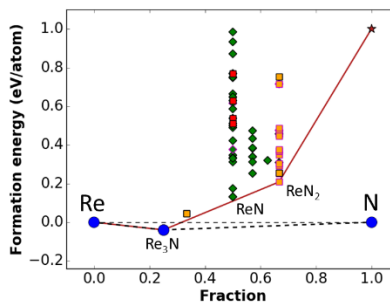

# Ru-N

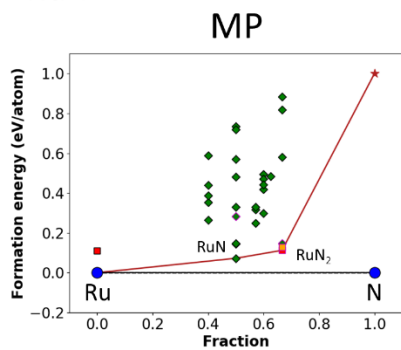

# FERE

No FERE  
correction for Ru

# SCAN

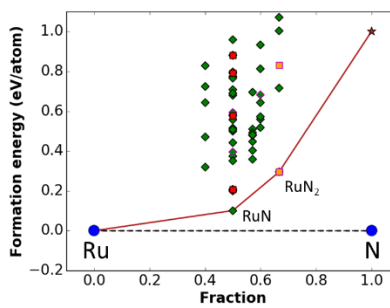

# Sb-N

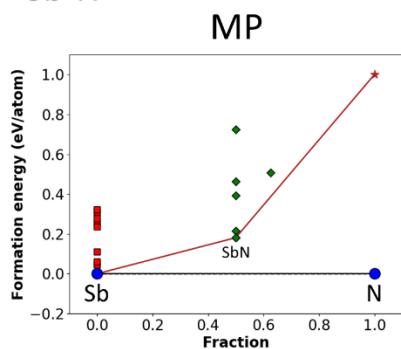

# FERE

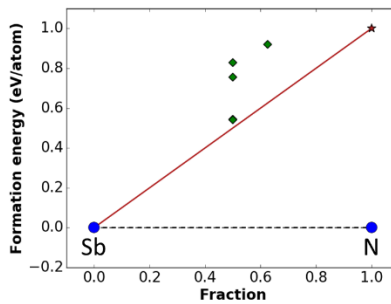

# SCAN

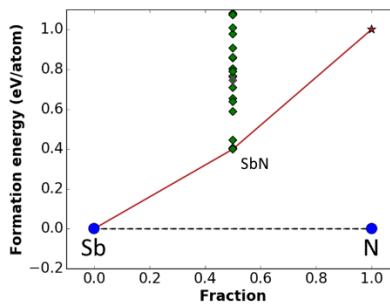

# Sn-N

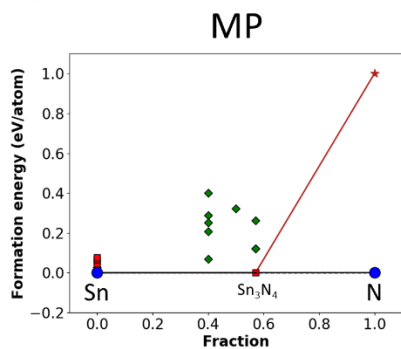

# FERE

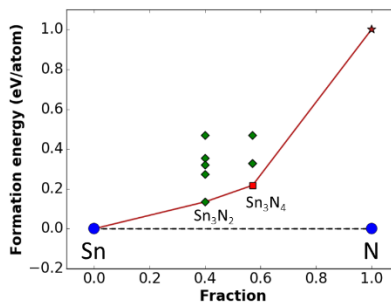

# SCAN

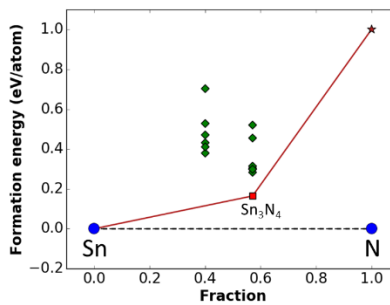

# Sr-N

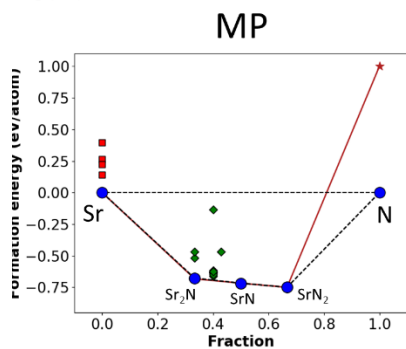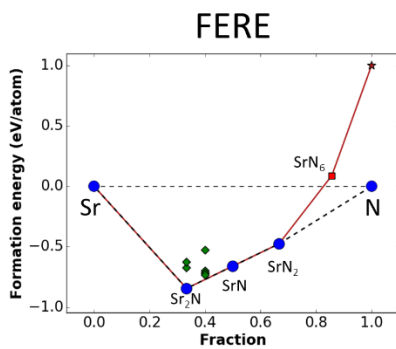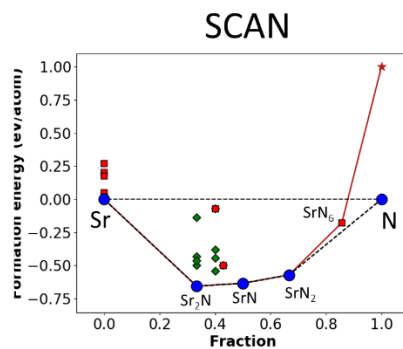

# Ta-N

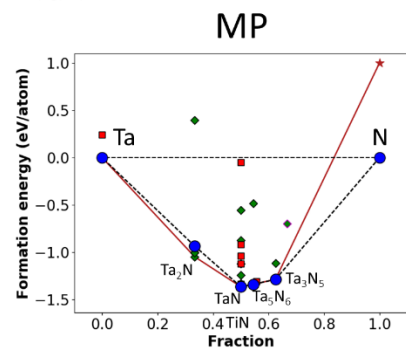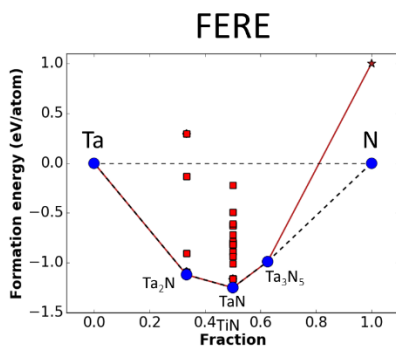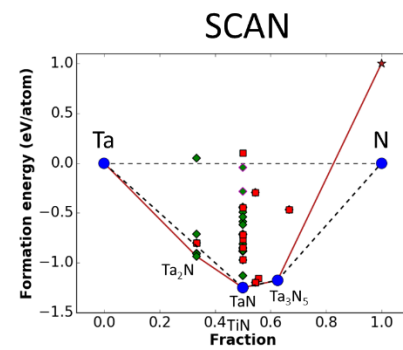

# Ti-N

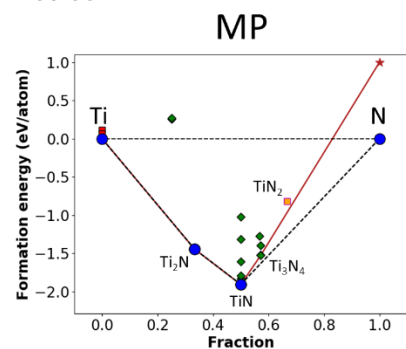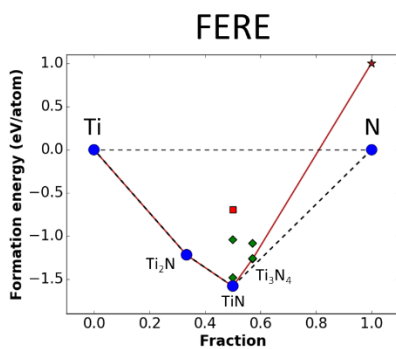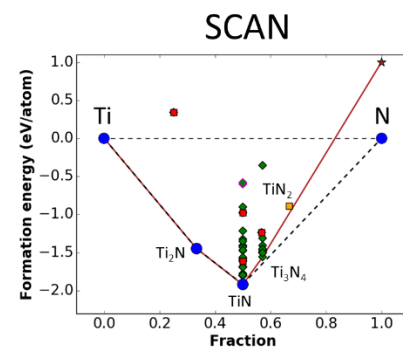

# V-N

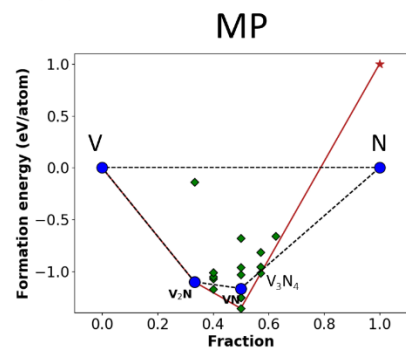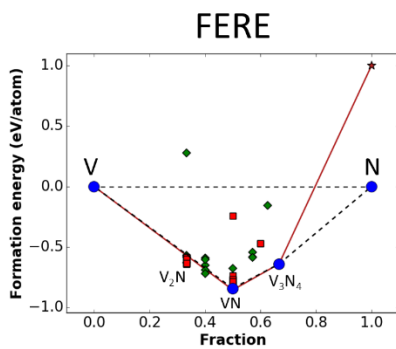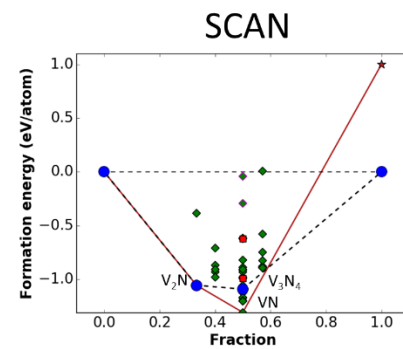

# W-N

MP

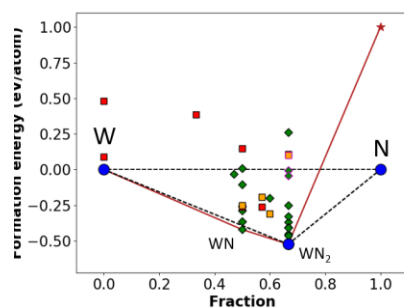

FERE

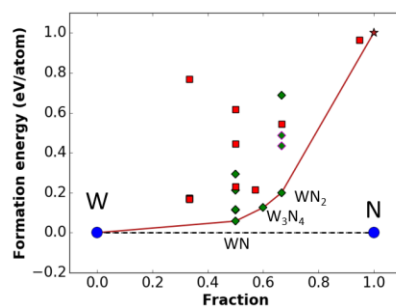

SCAN

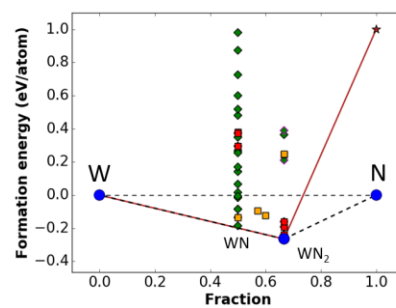

# Zr-N

MP

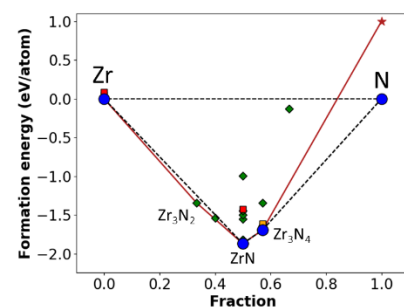

FERE

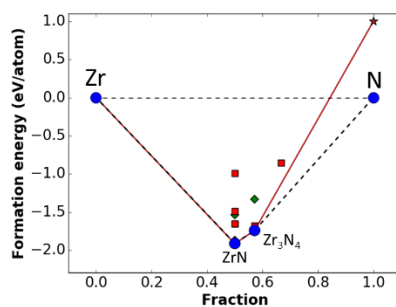

SCAN

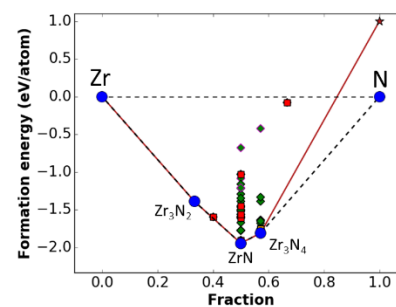

## Supplemental Information References

---

- <sup>1</sup> Chevrier, Vincent L., et al. "Hybrid density functional calculations of redox potentials and formation energies of transition metal compounds." *Physical Review B* 82.7 (2010): 075122.
- <sup>2</sup> Harl, Judith, and Georg Kresse. "Accurate bulk properties from approximate many-body techniques." *Physical review letters* 103.5 (2009): 056401.
- <sup>3</sup> Pozzo, M., and D. Alfe. "Structural properties and enthalpy of formation of magnesium hydride from quantum Monte Carlo calculations." *Physical Review B* 77.10 (2008): 104103.
- <sup>4</sup> Stevanović, Vladan, et al. "Correcting density functional theory for accurate predictions of compound enthalpies of formation: Fitted elemental-phase reference energies." *Physical Review B* 85.11 (2012): 115104.
- <sup>5</sup> Wang, Lei, Thomas Maxisch, and Gerbrand Ceder. "Oxidation energies of transition metal oxides within the GGA+ U framework." *Physical Review B* 73.19 (2006): 195107.
- <sup>6</sup> Jain, Anubhav, et al. "Formation enthalpies by mixing GGA and GGA+ U calculations." *Physical Review B* 84.4 (2011): 045115.
- <sup>7</sup> Tessier, F., et al. "Energetics of binary iron nitrides." *Solid State Sciences* 2.4 (2000): 457-462.
- <sup>8</sup> Sun, Jianwei, Adrienn Ruzsinszky, and John P. Perdew. "Strongly constrained and appropriately normed semilocal density functional." *Physical review letters* 115.3 (2015): 036402.
- <sup>9</sup> Sun, Jianwei, et al. "Accurate first-principles structures and energies of diversely bonded systems from an efficient density functional." *Nature Chemistry* (2016).
- <sup>10</sup> Muscat, Joseph, Varghese Swamy, and Nicholas M. Harrison. "First-principles calculations of the phase stability of TiO<sub>2</sub>." *Physical Review B* 65.22 (2002): 224112.
- <sup>11</sup> Curtarolo, Stefano, Dane Morgan, and Gerbrand Ceder. "Accuracy of ab initio methods in predicting the crystal structures of metals: A review of 80 binary alloys." *Calphad* 29.3 (2005): 163-211.
- <sup>12</sup> Kitchaev, Daniil A., et al. "Energetics of MnO<sub>2</sub> polymorphs in density functional theory." *Physical Review B* 93.4 (2016): 045132.
- <sup>13</sup> Mei, A. B., et al. "Dynamic and structural stability of cubic vanadium nitride." *Physical Review B* 91.5 (2015): 054101.
- <sup>14</sup> Zhou, Liangcai, et al. "Structural stability and thermodynamics of CrN magnetic phases from ab initio calculations and experiment." *Physical Review B* 90.18 (2014): 184102.
- <sup>15</sup> Liang, Yongcheng, Xun Yuan, and Wenqing Zhang. "The effect of magnetostructural coupling on mechanical behaviors in CrN." *Solid State Communications* 150.41 (2010): 2045-2048.
